# Supplementary material
Source: PubMed Central journal article supplement (PMC6109933)
Supplement: supp_RA118.003518_137524_1_supp_155726_pppy94.pdf [file supp_RA118.003518_137524_1_supp_155726_pppy94.pdf]

**Supporting Figure 1.** Amino acid sequences of *rbcL* and *rbcS* deduced from the analysis of the crystal structures of diatom Rubiscos. Conserved residues are *boxed*, strictly conserved residues have a *red background*, residues well conserved within a group are indicated by *red letters*, and the remaining residues are in *black letters*. Gaps are represented by dots. Residue numbering along the top refers to *T. antarctica*. *Symbols above* blocks of sequences correspond to the secondary structure:  $\alpha$ ,  $\alpha$ -helix;  $\beta$ ,  $\beta$ -strand;  $\eta$ ,  $3_{10}$ -helix. The secondary structure elements were named  $\beta$ A,  $\beta$ B...,  $\alpha$ A,  $\alpha$ B...etc, except for the strands and helices of the C-terminal  $\beta$  $\alpha$  barrel, which were named  $\beta$ 1,  $\beta$ 2...,  $\alpha$ 1,  $\alpha$ 2, etc according to Knight *et al.*, 1990. *Symbols below* blocks of sequences indicate the location of modified residues (green triangles) and the carbamylated lysine residue (green star). The sequence alignment was created using the PDB coordinates 5M2Z (*T. antarctica*), 5N9Z (*T. hyalina*), 6FTL (*S. marinoi*) and 5OYA (*C. chaetoceros*).

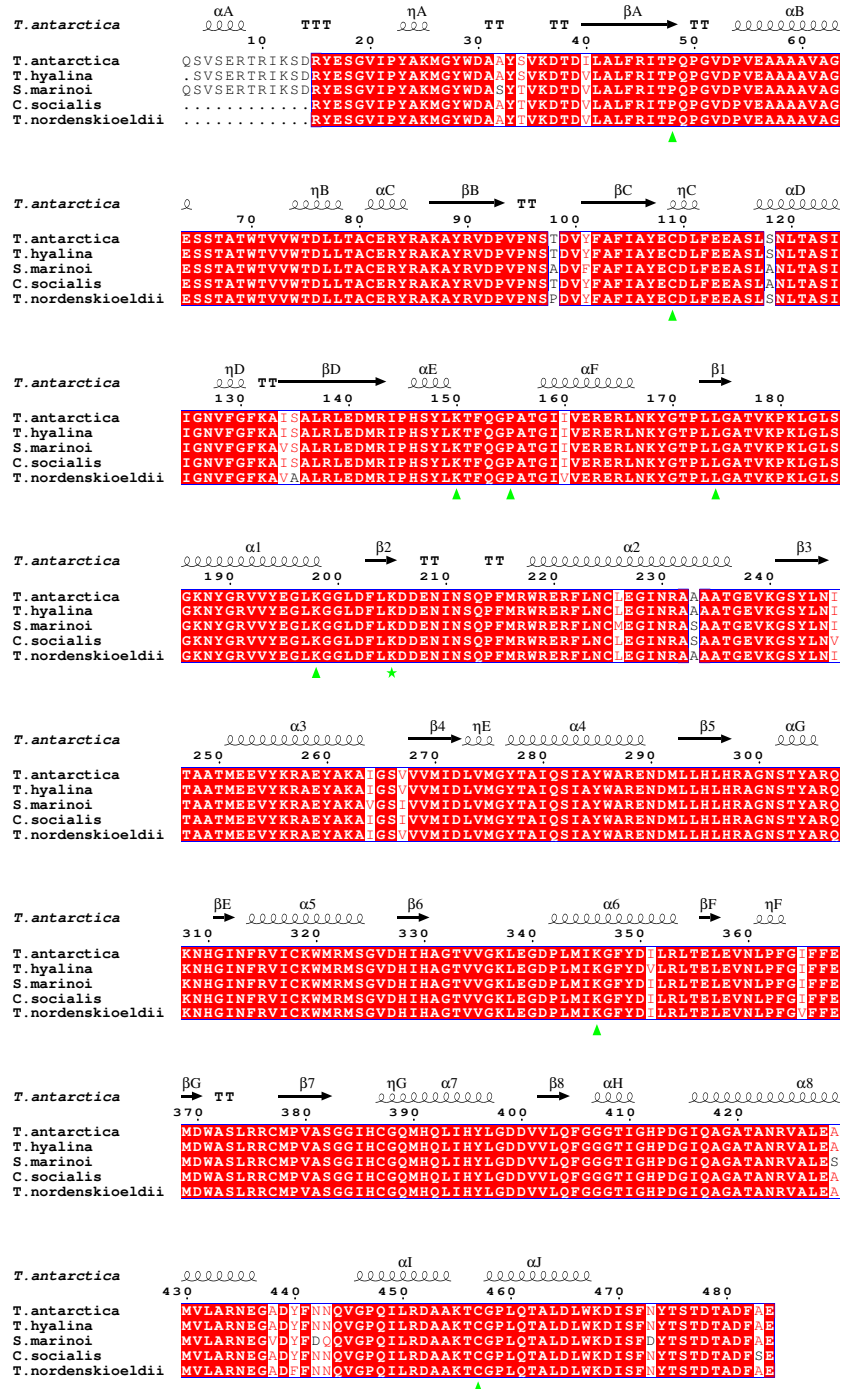

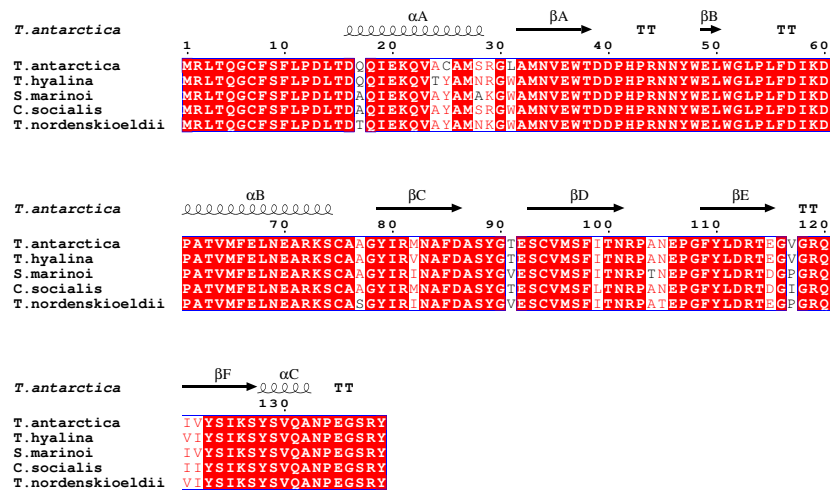

## REFERENCES

Knight, S. Andersson, I. and Brändén, C.-I. (1990). Crystallographic analysis of Ribulose 1,5-bisphosphate carboxylase from spinach at 2.4 Å resolution: subunit interactions and the active site. *J. Mol. Biol.* **215**, 113-160.
